# Supplementary material for: H-bonded network rearrangements in the S0, S1 and D0 states of neutral and cationic p-cresol(H2O)(NH3) complexes
Source: Royal Society of Chemistry journal article supplement (doi:10.1039/c2cp23586b), 2012-01-01
Supplement: c2cp23586b.pdf [file c2cp23586b.pdf]

**Table S1:** Relevant bond distances of the neutral ( $S_0$ ) structures shown in Figure 5.

| Bonds | Distances (Å) |              |               |              |             |
|-------|---------------|--------------|---------------|--------------|-------------|
|       | Structure I   | Structure II | Structure III | Structure IV | Structure V |
| O1-H1 | 0.98008       | 1.27489      | 1.48338       | 1.56939      | 1.94759     |
| H1-O2 | 1.80630       | 1.15986      | 1.03418       | 1.00782      | 0.97239     |
| O2-H2 | 0.98751       | 1.41996      | 1.63620       | 1.75610      | 2.18399     |
| H2-N1 | 1.86535       | 1.14371      | 1.06031       | 1.03876      | 1.02098     |
| N1-H3 | 1.01929       | 1.05704      | 1.11313       | 1.21945      | 1.81828     |
| H3-O1 | 2.41828       | 1.71447      | 1.53563       | 1.33608      | 0.99313     |

**Table S2:** Relevant bond distances of the neutral ( $S_0$ ) structures shown in Figure 8.

| Bonds | Distances (Å) |              |               |              |             |              |
|-------|---------------|--------------|---------------|--------------|-------------|--------------|
|       | Structure I   | Structure II | Structure III | Structure IV | Structure V | Structure VI |
| O1-H1 | 1.05477       | 1.28557      | 1.51636       | 1.67023      | 1.90102     | 4.20898      |
| H1-O2 | 1.43269       | 1.13623      | 1.02012       | 0.98976      | 0.97566     | 0.96416      |
| O2-H2 | 1.01977       | 1.10133      | 1.43075       | 1.65049      | 1.70589     | 1.74378      |
| H2-N1 | 1.67533       | 1.44746      | 1.12529       | 1.05917      | 1.04972     | 1.04411      |
| N1-H3 | 1.01766       | 1.01863      | 1.02120       | 1.04025      | 1.04965     | 1.07005      |
| H3-O1 | 4.51866       | 4.11680      | 3.86105       | 1.89171      | 1.76684     | 1.57982      |
